# Supplementary material for: Acetylenic linkage dependent electronic and optical behaviour of morphologically distinct ‘-ynes’
Source: Royal Society of Chemistry journal article supplement (doi:10.1039/c9cp01914f), 2019-01-01
Supplement: c9cp01914f1.pdf [file c9cp01914f1.pdf]

Supplementary Article

**Acetylenic linkage dependent electronic and  
optical behaviour of morphologically distinct '-ynes'**

Susmita Jana, Arka Bandyopadhyay, Debnarayan Jana\*

Department of Physics, University of Calcutta , 92 Acharya Prafulla Chandra Road, Kolkata  
700009, India.

\* Corresponding Author. E-mail Address: [djphy@caluniv.ac.in](mailto:djphy@caluniv.ac.in), Fax: 0091 033 2350 9755.

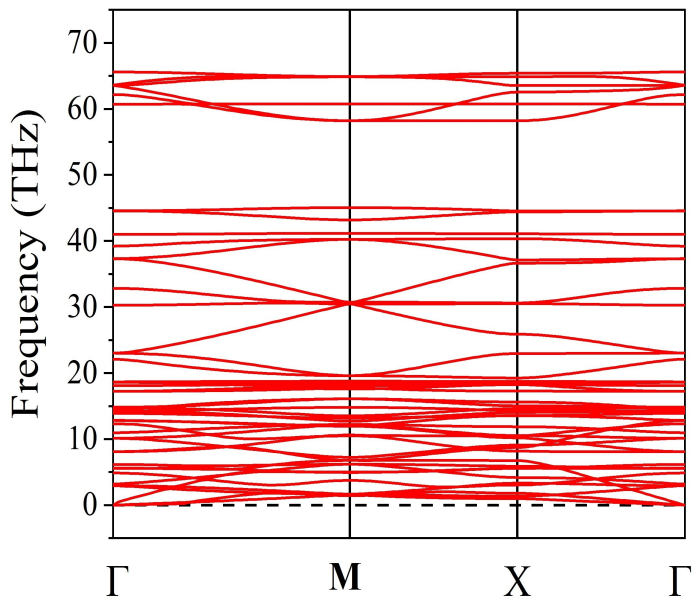

(a)

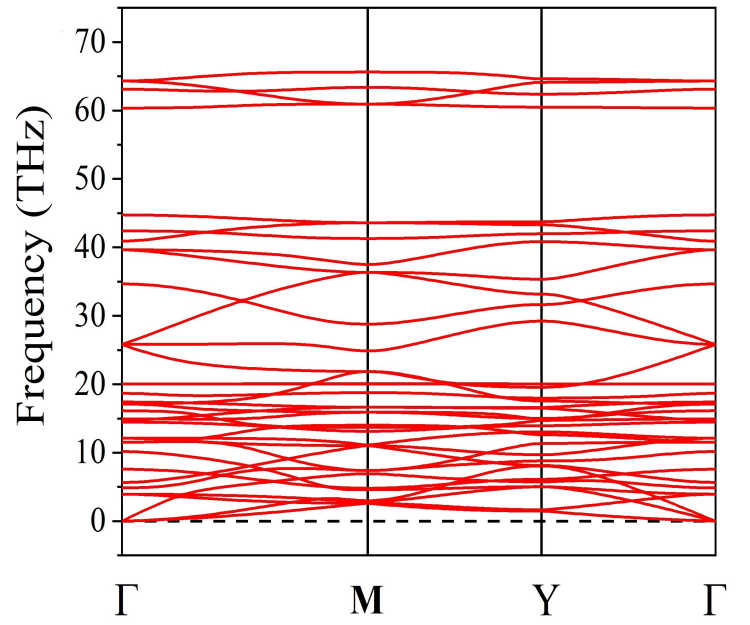

(b)

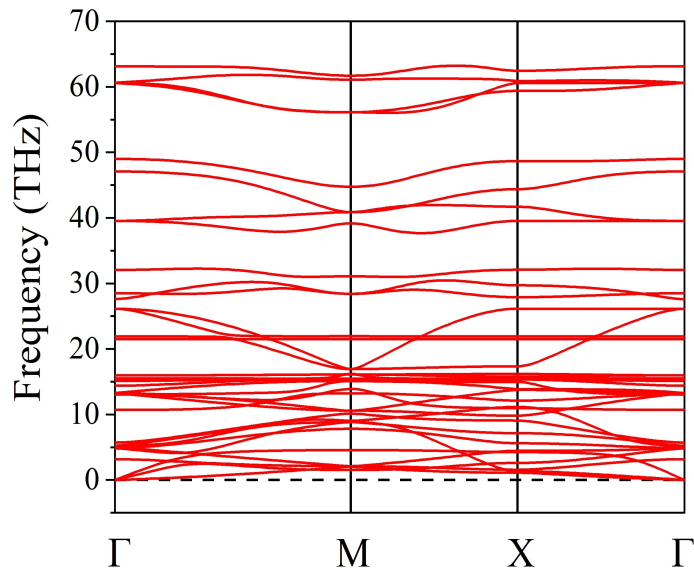

(c)

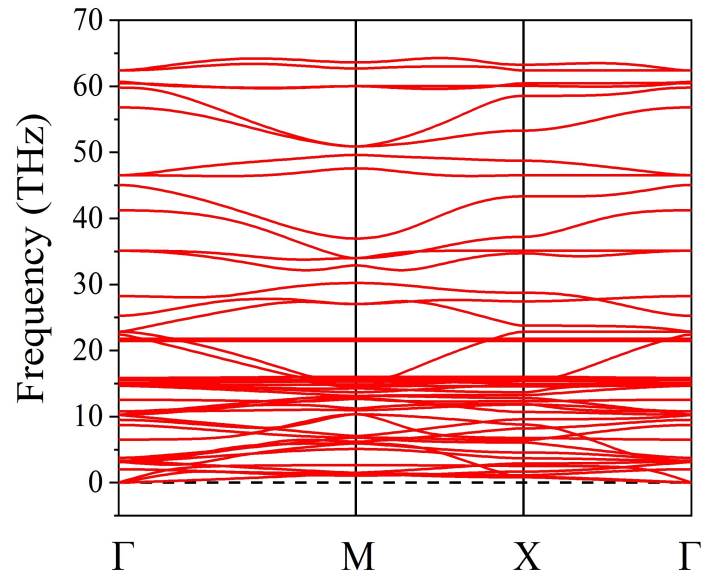

(d)

**Figure 1 : Phonon spectra for the entire Brillouin zone for (a)  $\alpha$ -T graphyne, (b)  $\beta$ -T graphyne, (c) T-graphdiyne and (d) T-graphtriyne.**

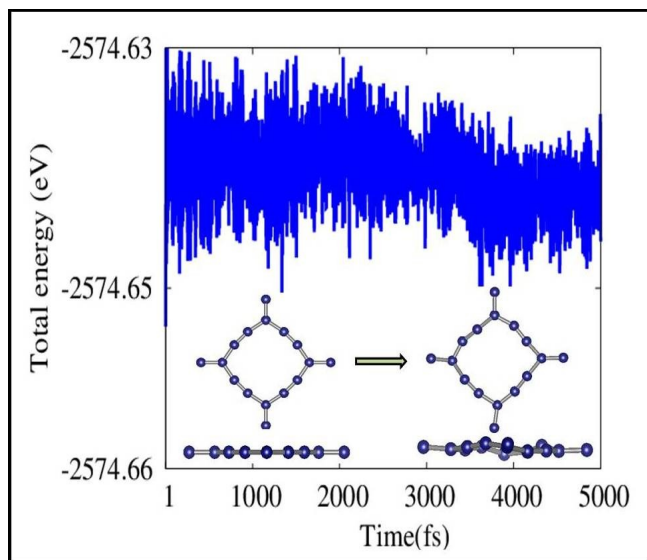

(a)

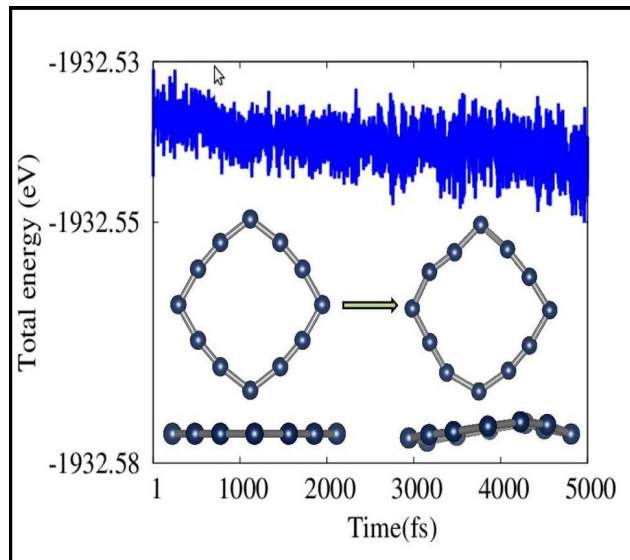

(b)

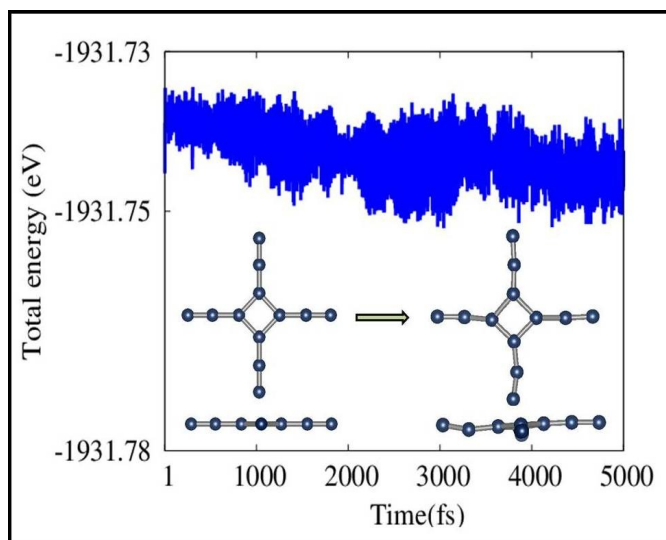

(c)

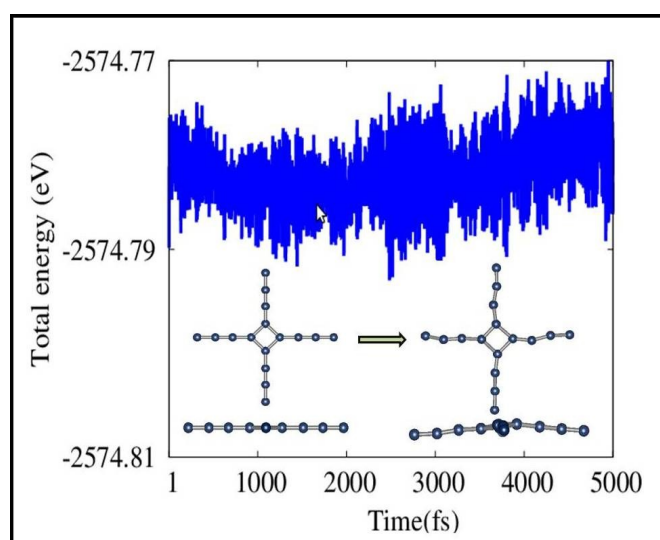

(d)

**Figure 2 : AIMD (ab initio molecular dynamics) simulation for (a)  $\alpha$ -T graphyne, (b)  $\beta$ -T graphyne, (c) T-graphdiyne and (d) T-graphtriyne at 1500 K with the timestep of 1fs.**

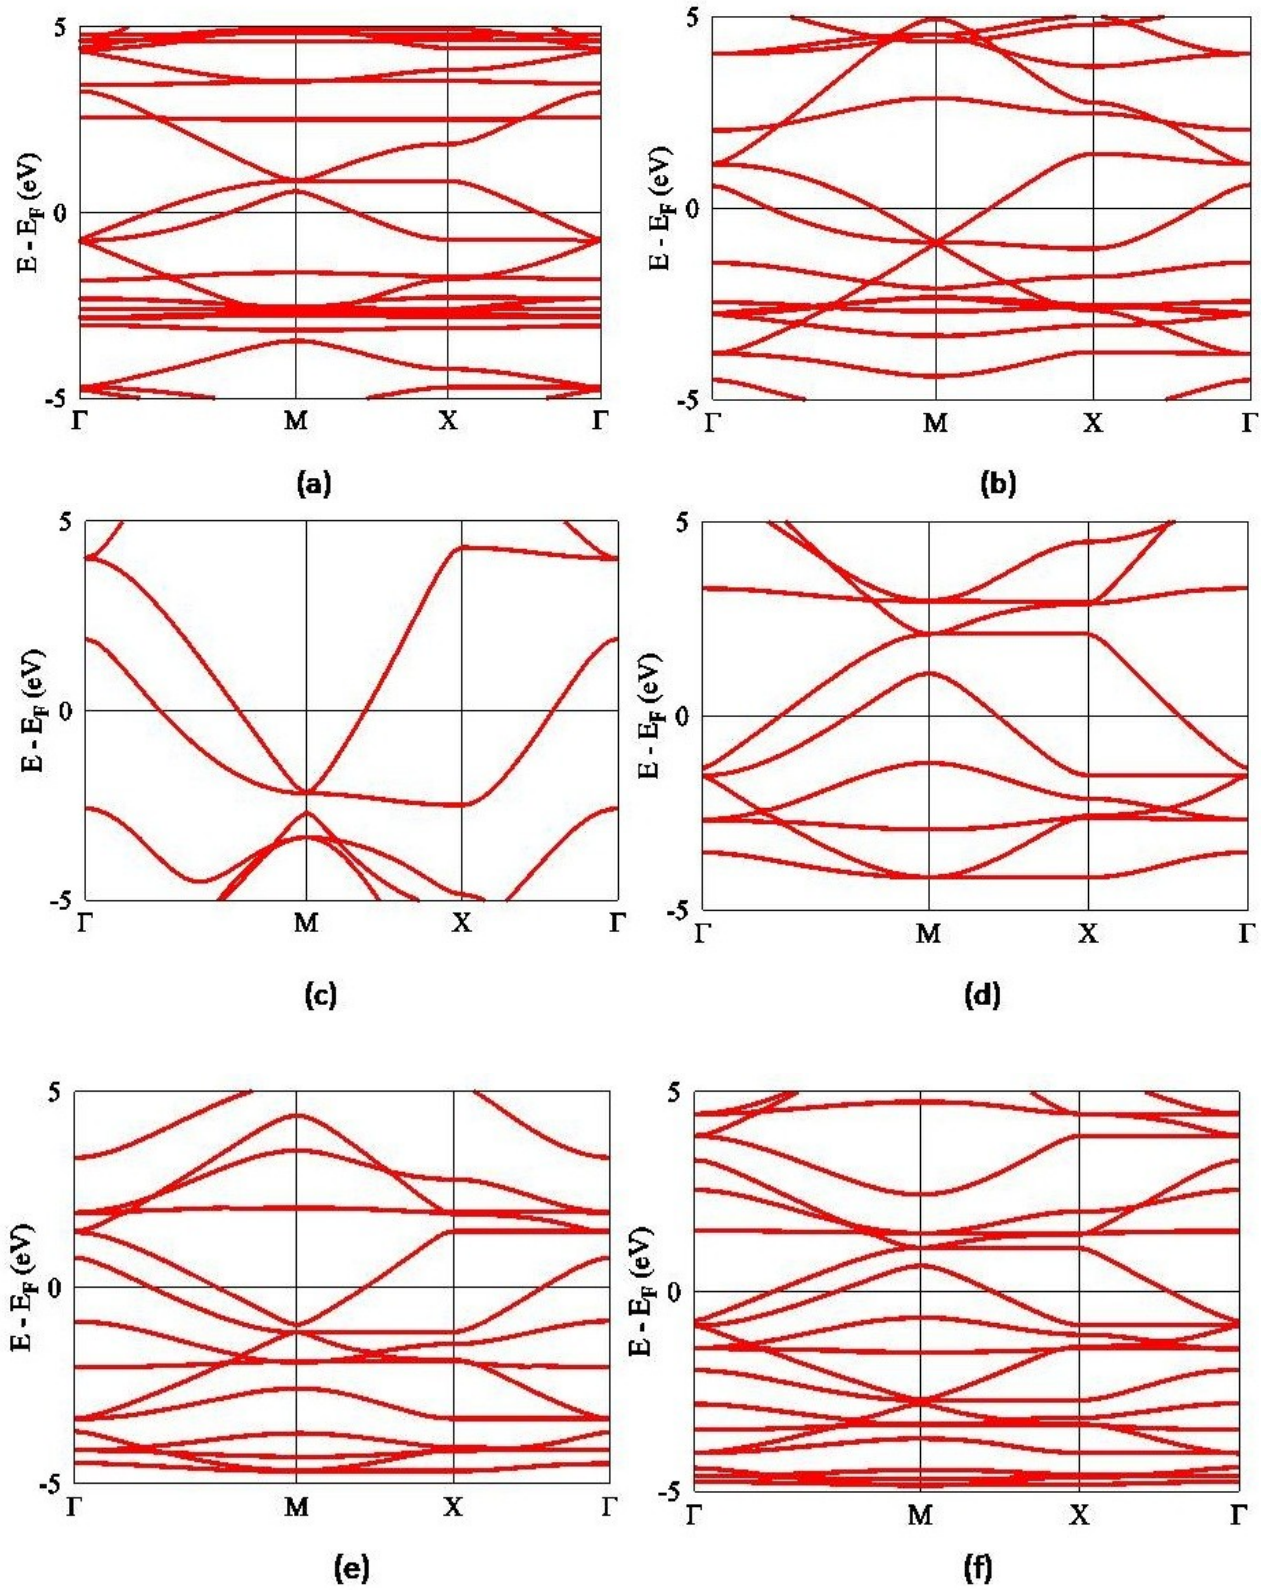

**Figure 3 : Electronic band spectra calculated from DFT for (a)  $\alpha$ -T graphyne , (b)  $\beta$ -T graphyne ,(c) T graphene, (d)  $\gamma$ -T graphyne, (e) T graphdiyne, (f) T graphtriyne.**



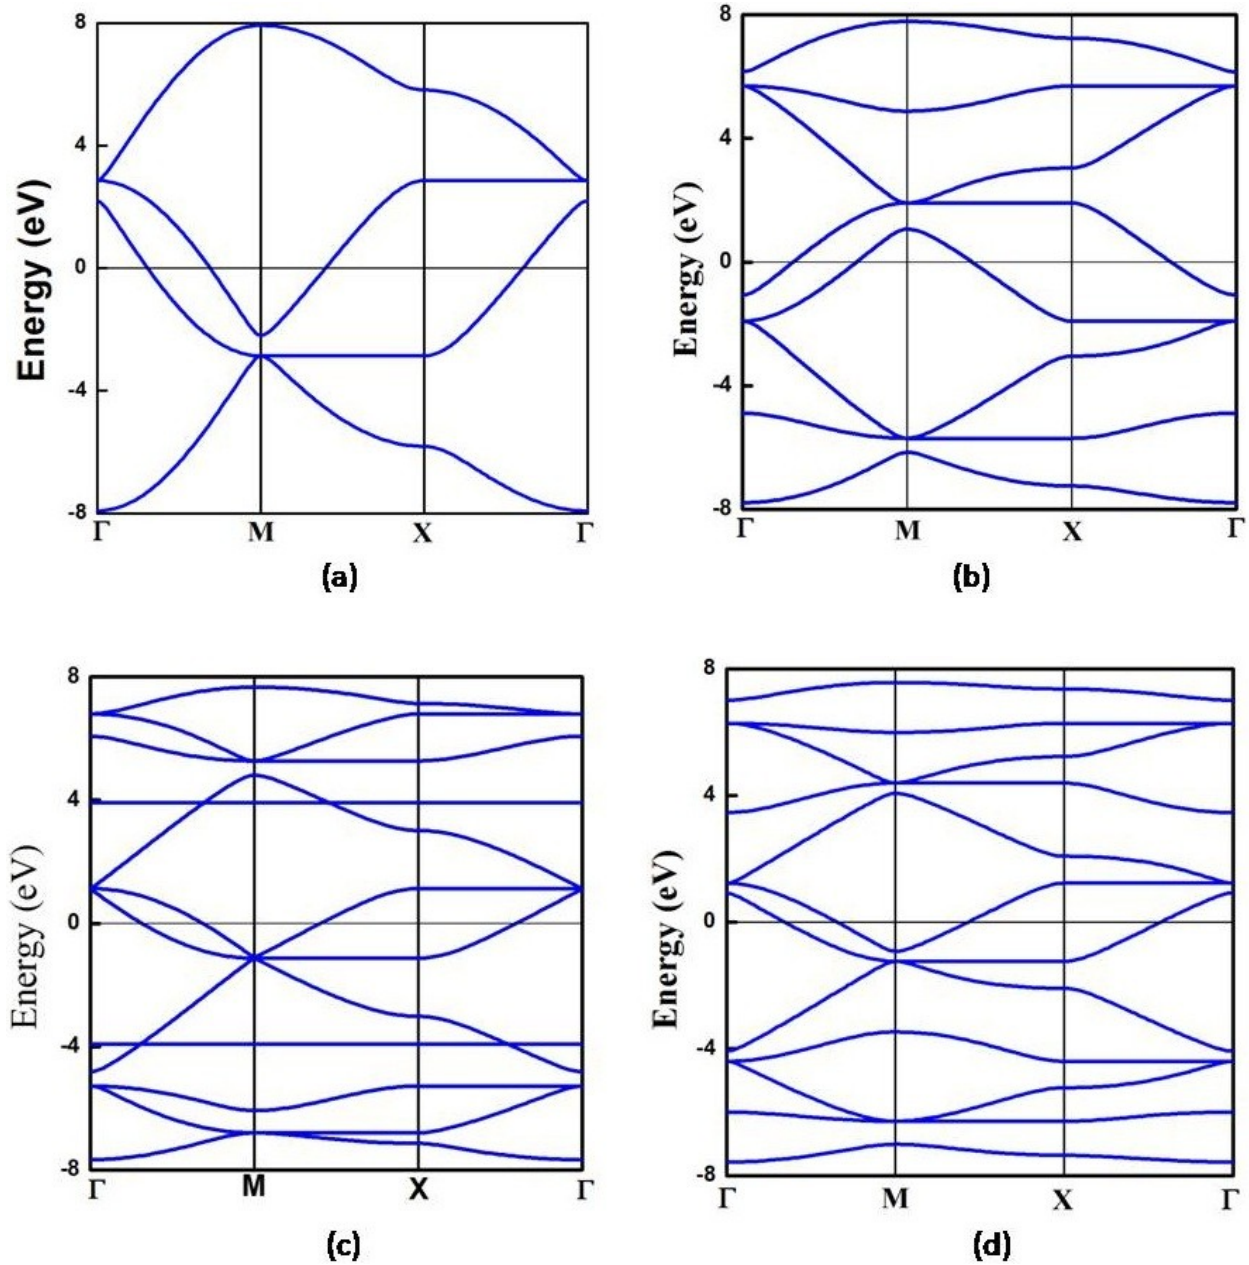

**Figure 4:** Electronic band spectra calculated from TB analysis for (a) T graphene, (b)  $\gamma$ -T graphyne, (c)  $\beta$ -T graphyne, (d) T graphdiyne.

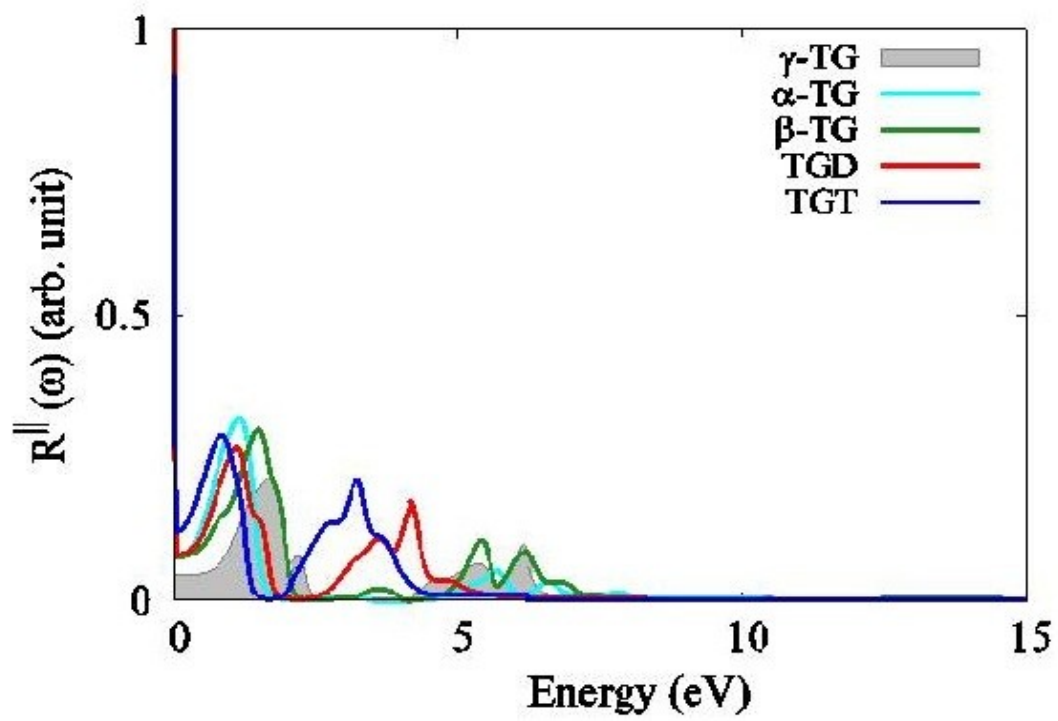

Figure 5 : Reflectivity co-efficient variation with energy.
